# Supplementary material for: WNT5B governs the phenotype of basal-like breast cancer by activating WNT signaling
Source: PubMed Central journal article supplement (PMC6714433; doi:10.1186/s12964-019-0419-2), 2019-08-28

# Figure-S1

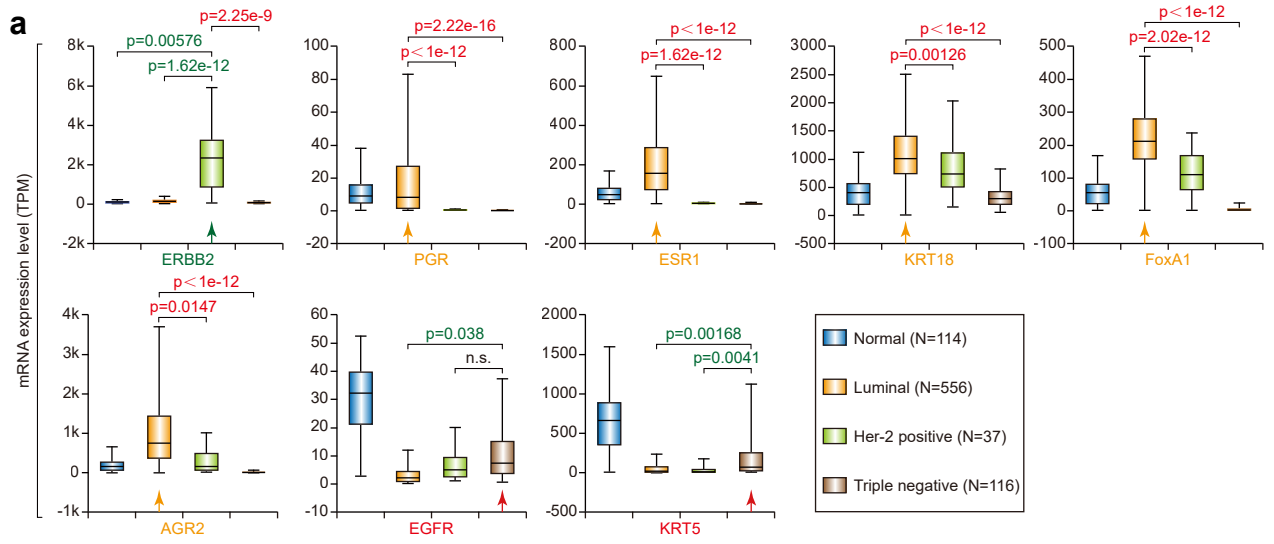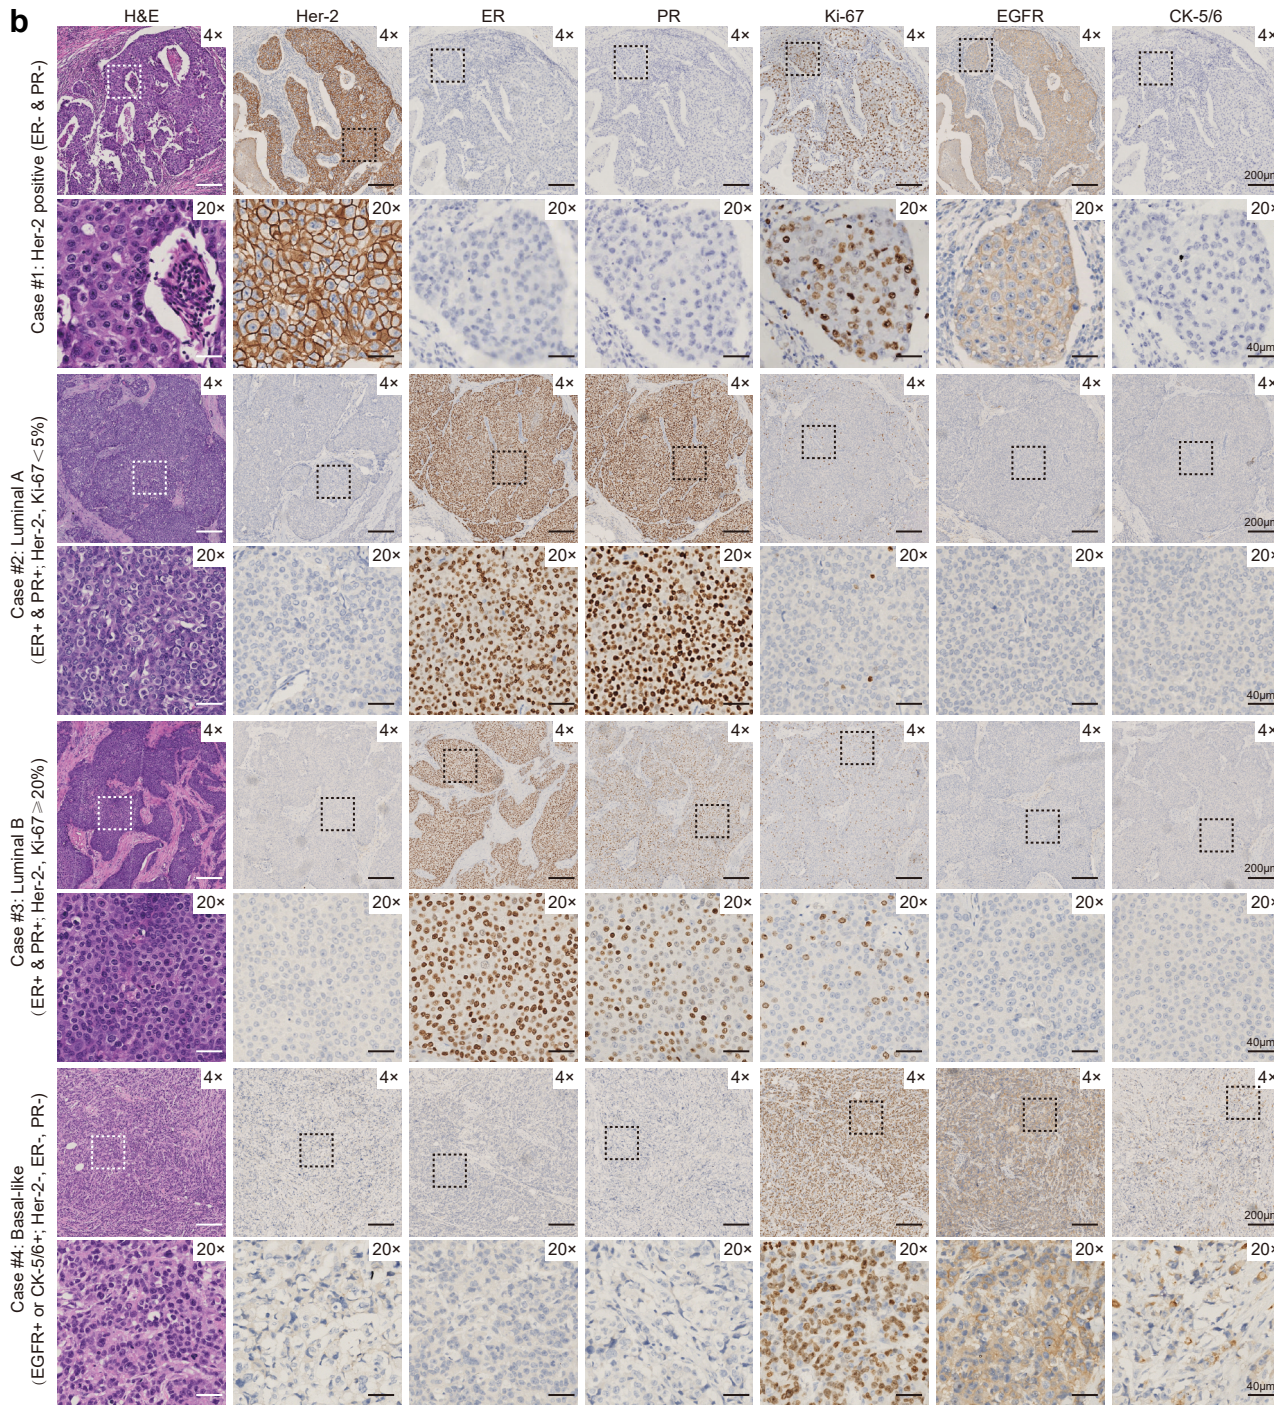

# Figure-S2

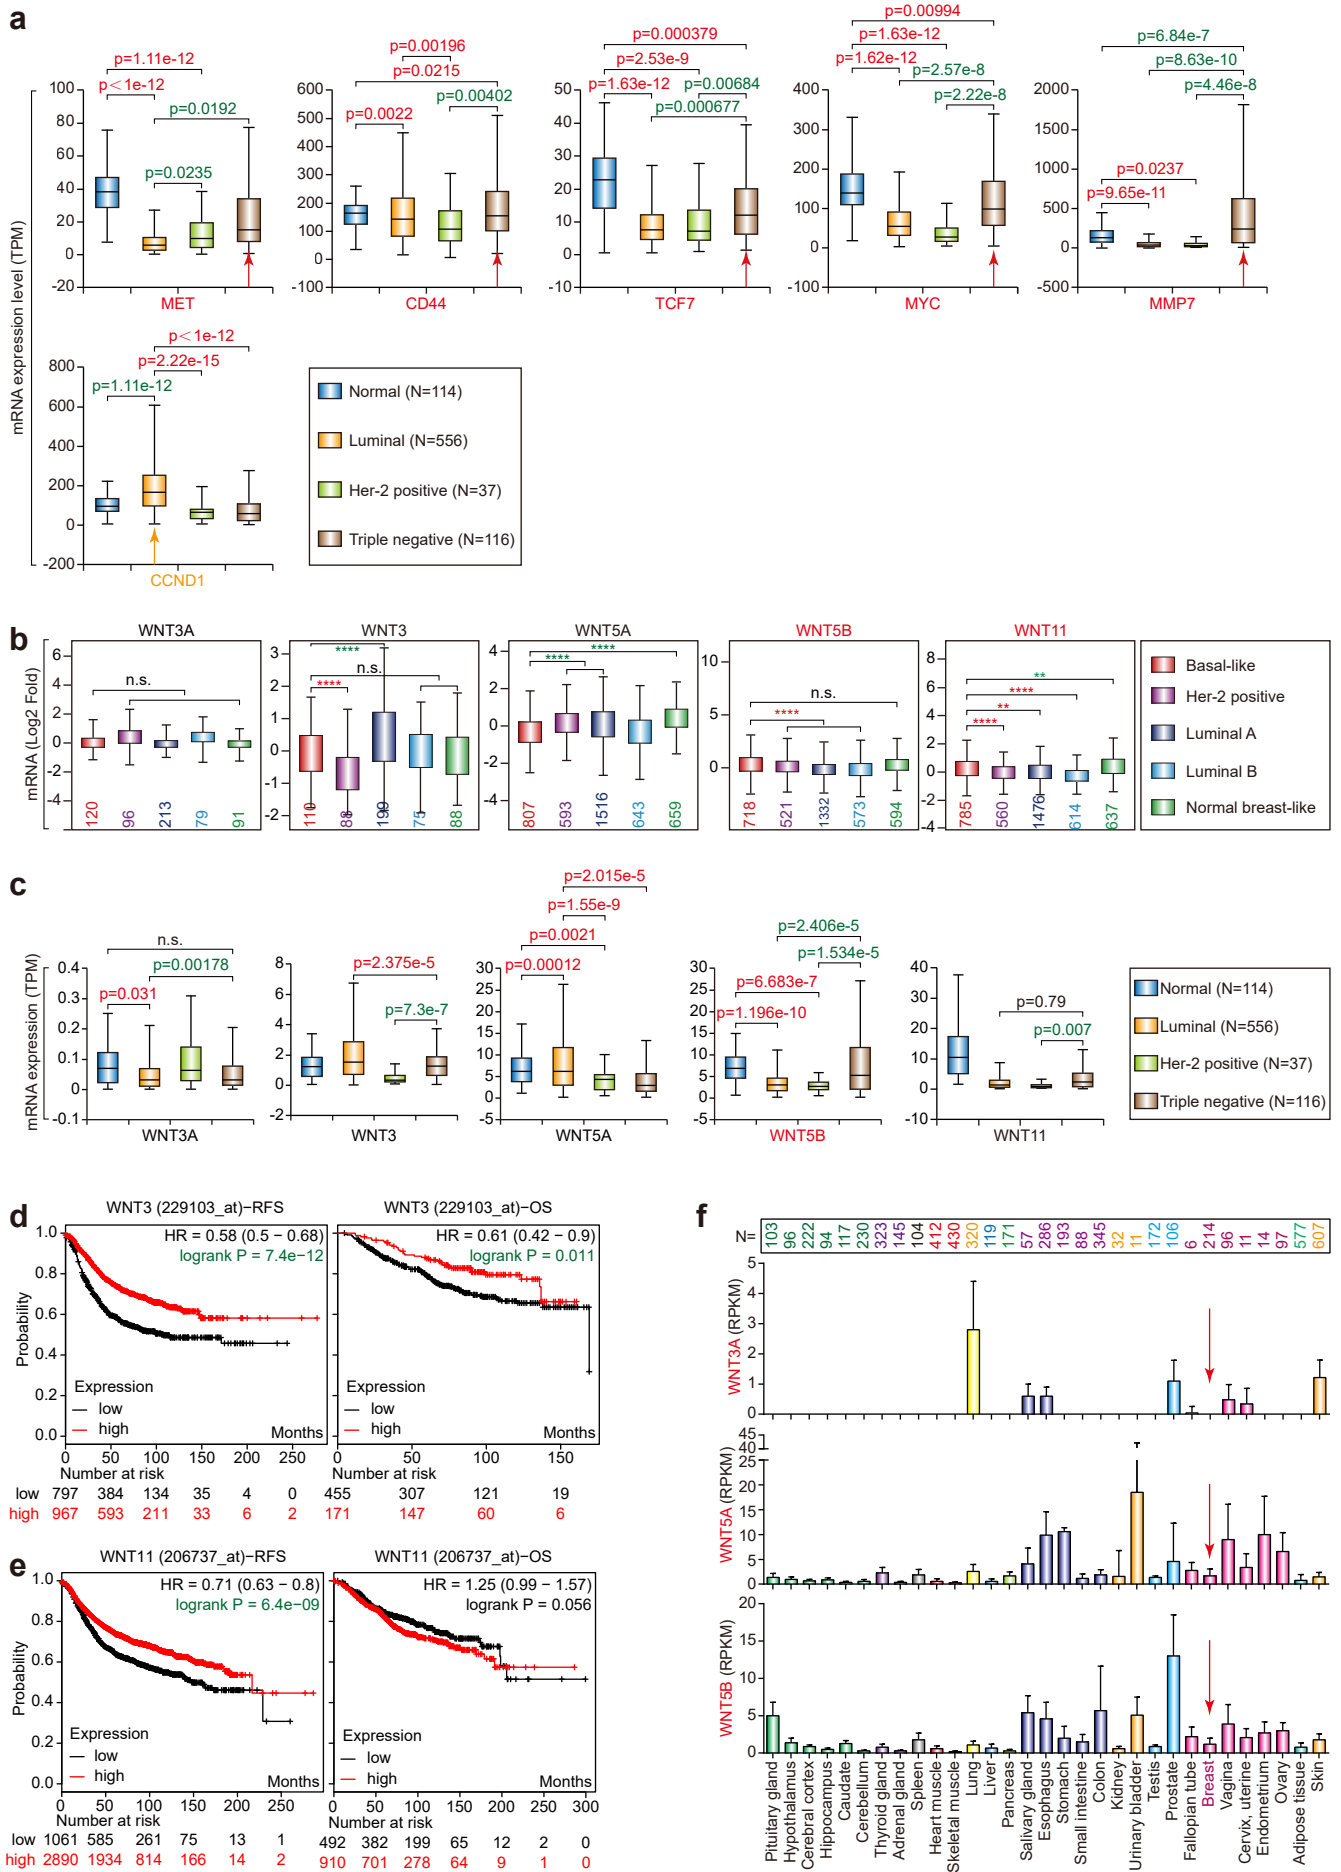



**Figure-S3**

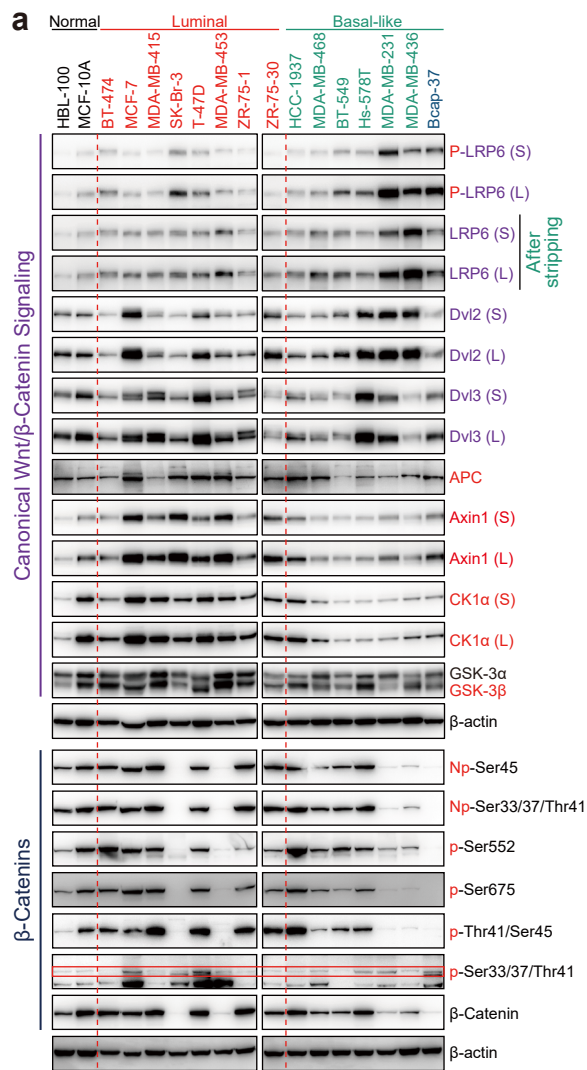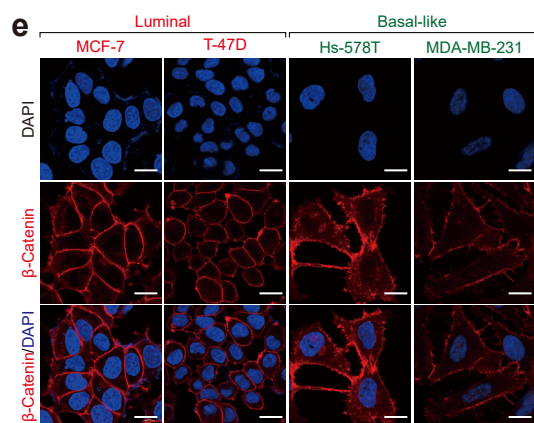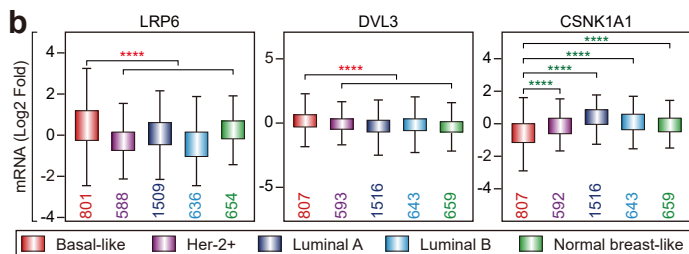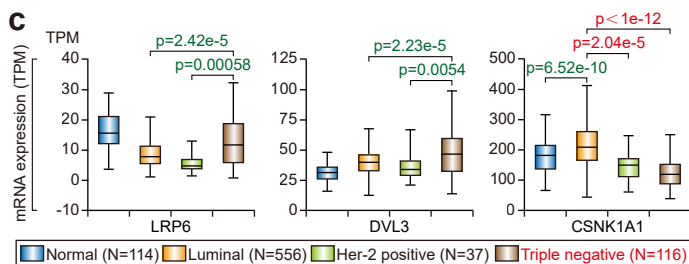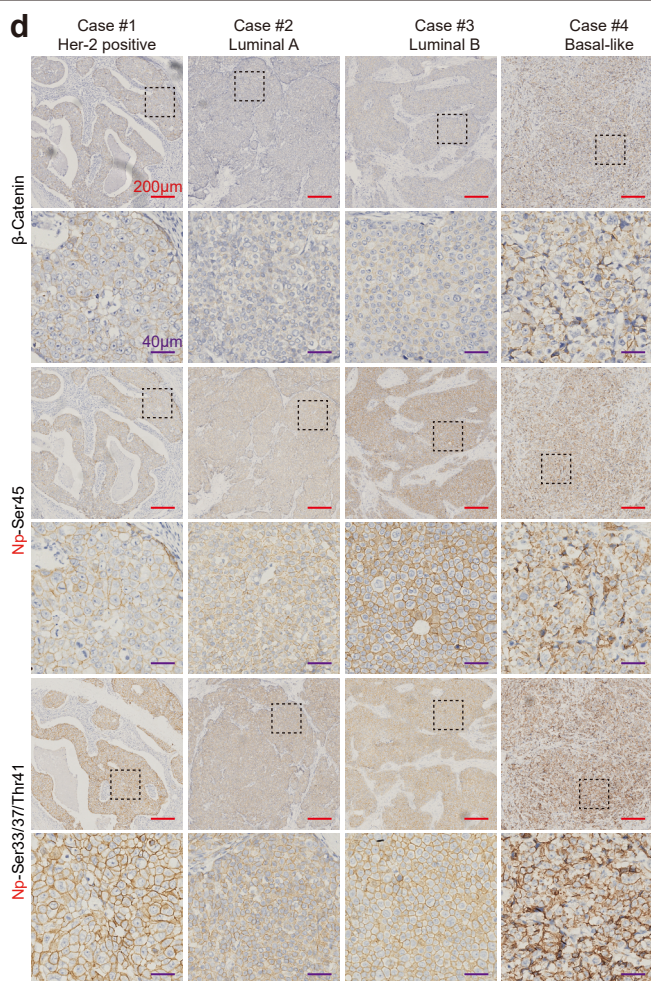

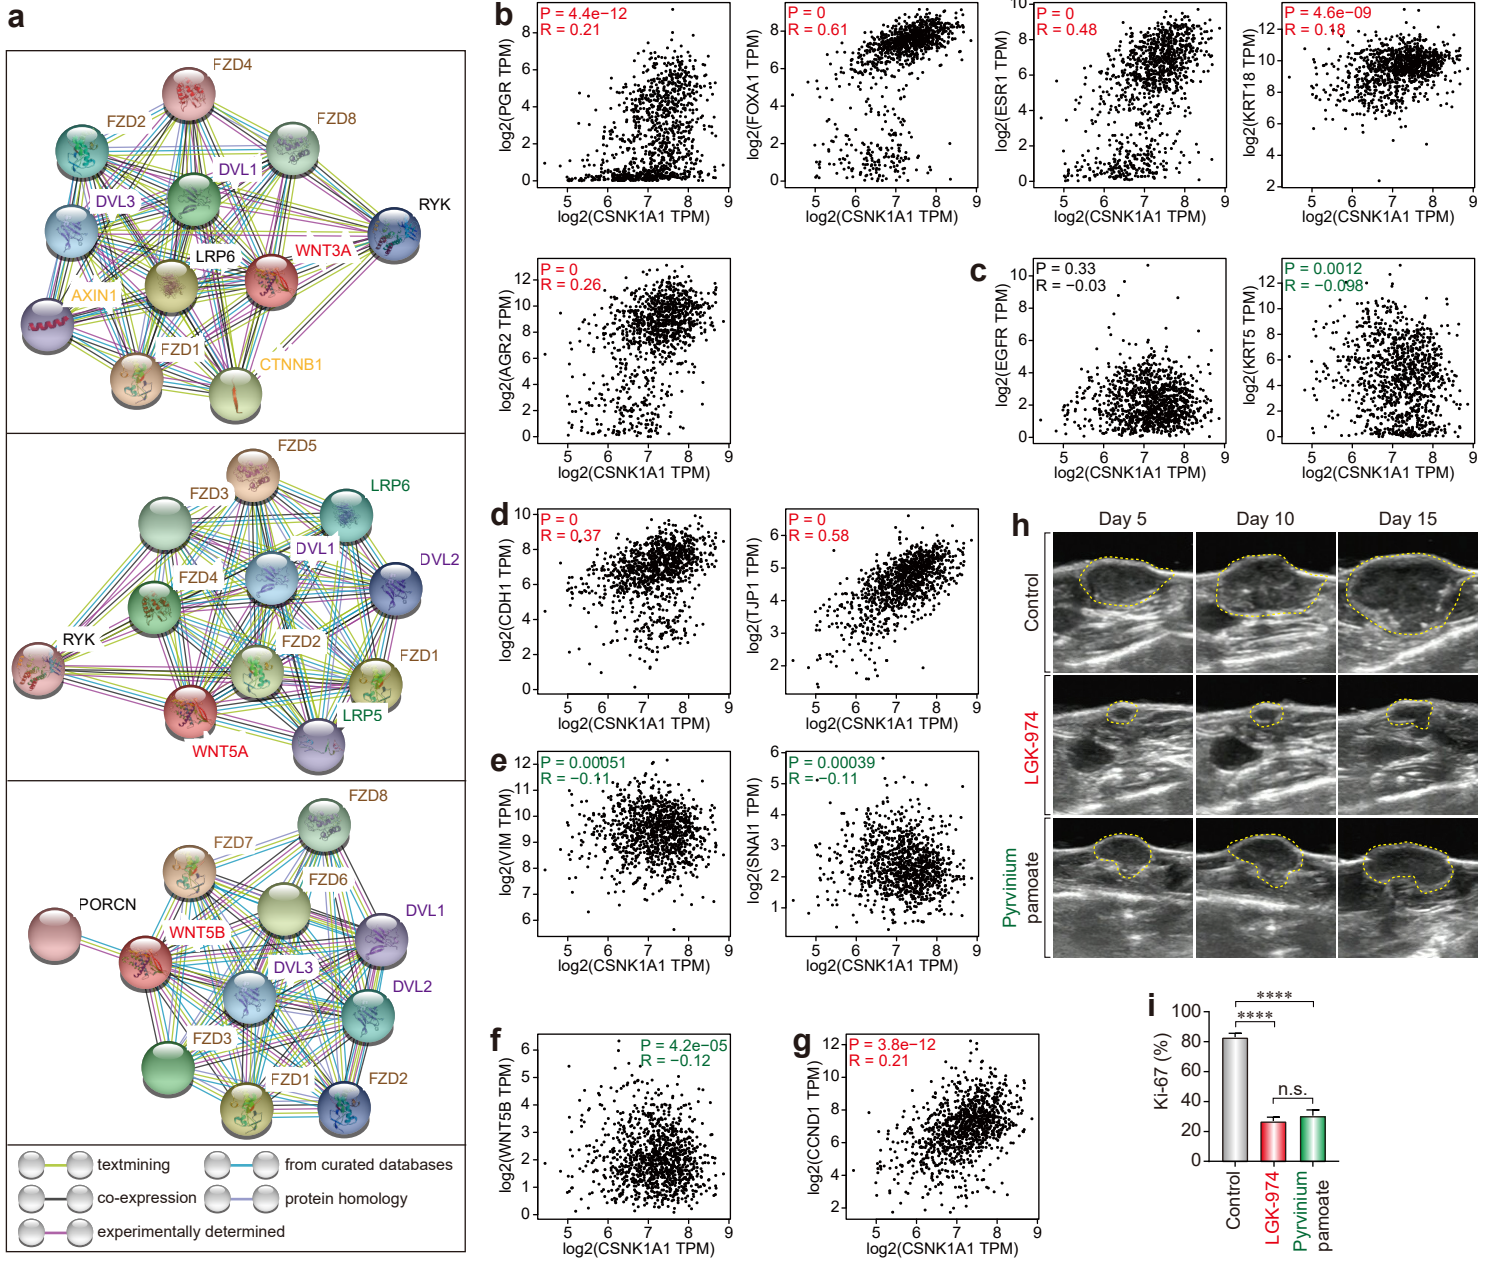



Figure-S5

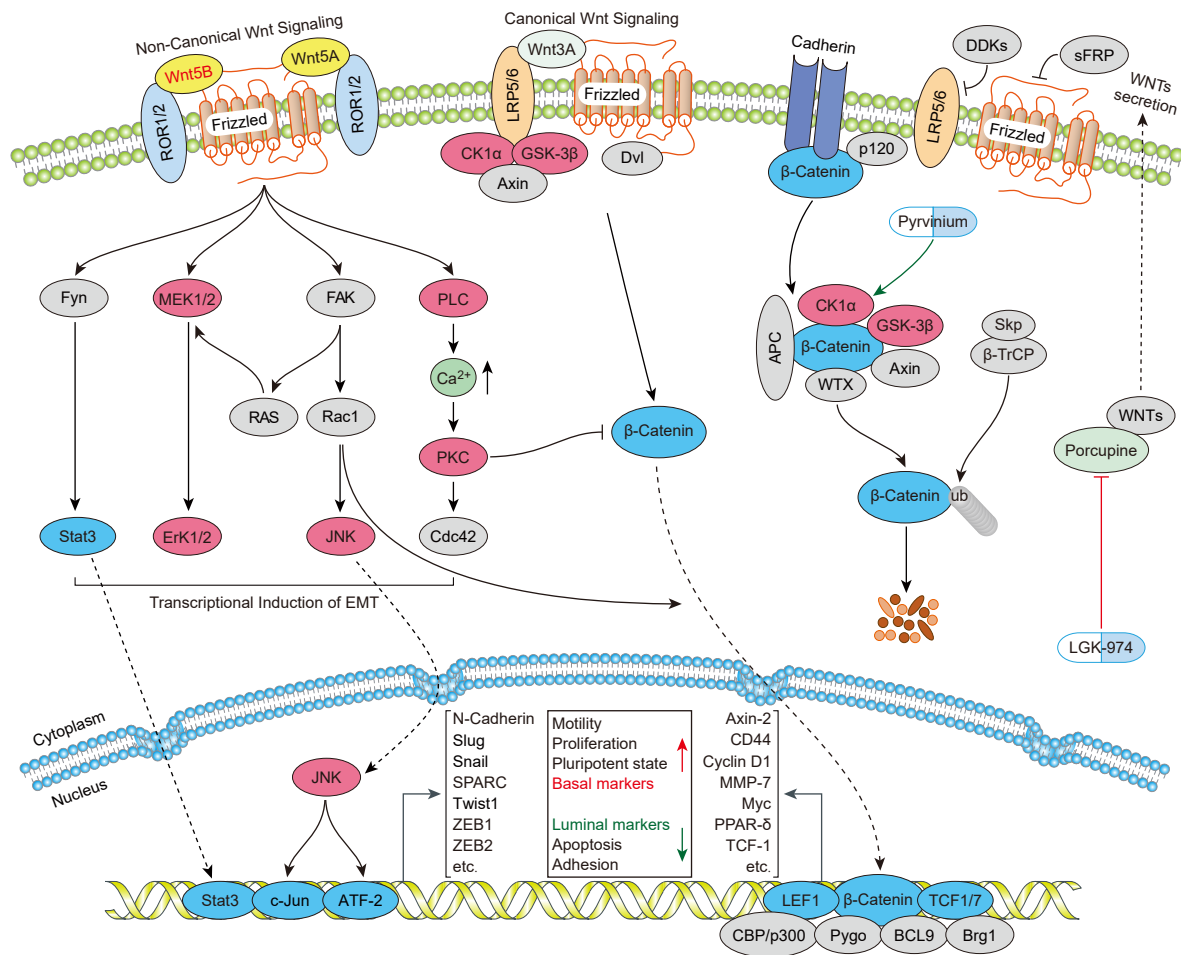

Supplement: 12964_2019_419_MOESM1_ESM.pdf [file 12964_2019_419_MOESM1_ESM.pdf]
